# Supplementary material for: Anion recovery from water by cross-linked cationic surfactant nanoparticles across dialysis membranes
Source: Royal Society of Chemistry journal article supplement (doi:10.1039/c8en00281a), 2018-01-01
Supplement: c8en00281a1.pdf [file c8en00281a1.pdf]

## Supporting Information

### **Anion recovery from water by cross-linked cationic surfactant nanoparticles across dialysis membranes**

*Ming Chen<sup>a</sup>, Chad T. Jafvert<sup>a,b,\*</sup>*

<sup>a</sup> Lyles School of Civil Engineering, Purdue University, West Lafayette, IN 47907, USA

<sup>b</sup> Division of Environmental and Ecological Engineering, Purdue University, West  
Lafayette, IN 47907, USA

\* Corresponding author info: Chad T. Jafvert, [jafvert@ecn.purdue.edu](mailto:jafvert@ecn.purdue.edu)

**Table S1.** Equations for calculating anion distribution between water and micelles<sup>1</sup>

|               | Equations <sup>†‡</sup>                                                                                                                                                                                                                                                                                                      |
|---------------|------------------------------------------------------------------------------------------------------------------------------------------------------------------------------------------------------------------------------------------------------------------------------------------------------------------------------|
| Mass balances | $[Cl^-]_{total} = [QASE]_{total} + [Cl^-]_{initial}$ $[Cl^-]_{total} = [Cl^-]_{aq} + [Cl^-]_{mic} * [M]$ $[B_i^-]_{total} = [B_i^-]_{aq} + [B_i^-]_{mic} * [M]$ $[B_j^{2-}]_{total} = [B_j^{2-}]_{aq} + [B_j^{2-}]_{mic} * [M]$ $[M] = [QASE]_{total}$ $[Cl^-]_{mic} + \sum_i [B_i^-]_{mic} + 2 \sum_j [B_j^{2-}]_{mic} = 1$ |
| Mass action   | $K_{selA^-}^{B_i^-} = \frac{[Cl^-]_{aq}[B_i^-]_{mic}}{[Cl^-]_{mic}[B_i^-]_{aq}}$ $K_{selA^-}^{B_j^{2-}} = \frac{[Cl^-]_{aq}^2[B_j^{2-}]_{mic}}{[Cl^-]_{mic}^2[B_j^{2-}]_{aq}}$                                                                                                                                               |
| pH            | $pH = -\log[H^+]$                                                                                                                                                                                                                                                                                                            |
| Speciation    | $K_a = \frac{[H^+][HPO_4^{2-}]}{[H_2PO_4^-]}$                                                                                                                                                                                                                                                                                |

<sup>†</sup> $B_i$  is  $F^-$ ,  $Cl^-$ ,  $H_2PO_4^-$ ,  $NO_2^-$ , or  $NO_3^-$ ;  $B_j$  is  $SO_4^{2-}$  or  $HPO_4^{2-}$ . For mass balance of

phosphate,  $[PO_4^{3-}]_{total} = [H_2PO_4^-]_{aq} + [HPO_4^{2-}]_{aq} + [H_2PO_4^-]_{mic} * [M] +$

$[HPO_4^{2-}]_{mic} * [M]$

<sup>‡</sup>Items and units have been defined in section 2.4 in the paper.

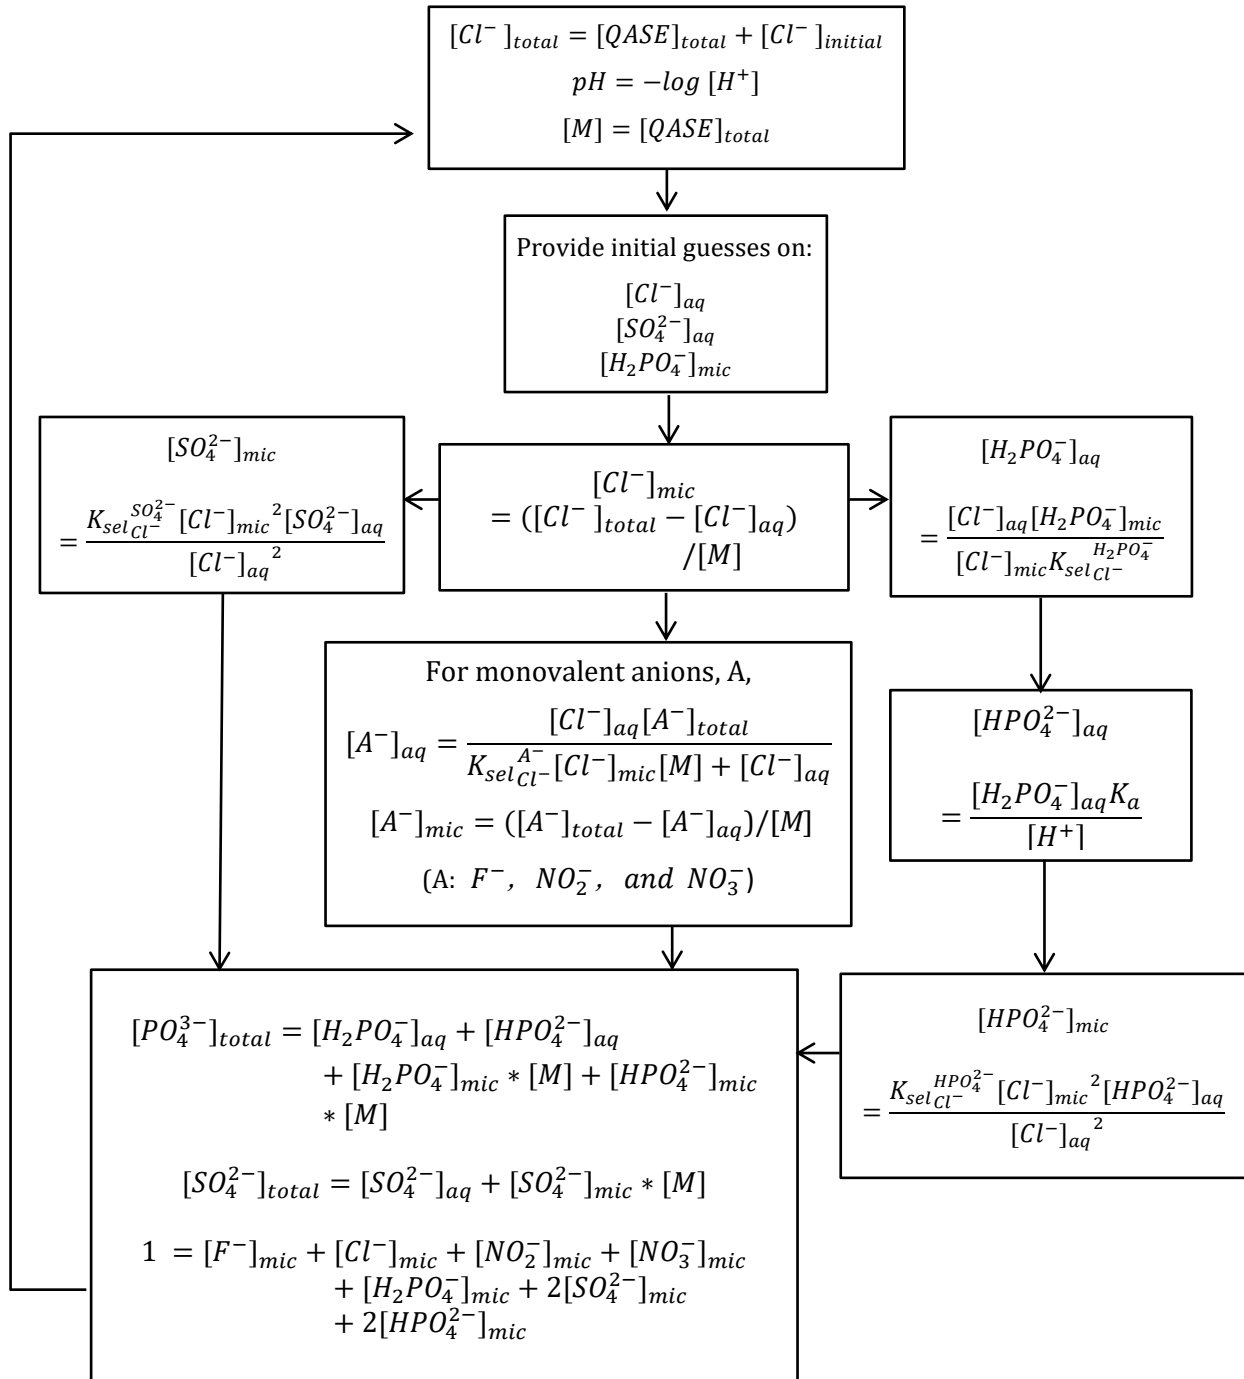

**Figure S1.** Iterative least squares method used to minimize residuals between the left-hand and right hand sides of the equations in the last box ( $[PO_4^{3-}]_{total}$ ,  $[SO_4^{2-}]_{total}$ , and the total concentration of micellar phase species {i.e., = 1 mole/mole}), by adjusting the guesses on  $[Cl^-]_{aq}$ ,  $[SO_4^{2-}]_{aq}$ , and  $[H_2PO_4^-]_{mic}$  after each iteration, using Solver in Excel. <sup>1</sup>

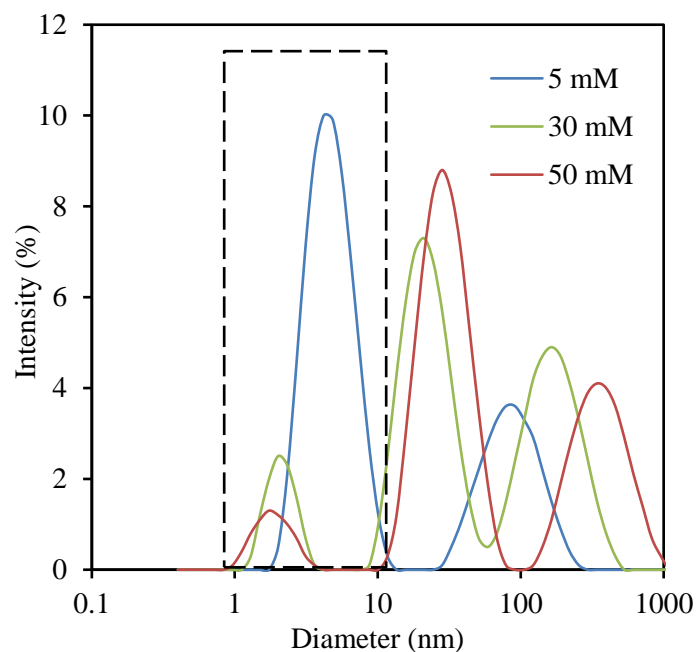

**Figure S2.** Intensity size distribution of QACLE micelles at different concentrations

The intensity distribution (shown in **Figure S2**) is weighted based on the scattering intensity of each particle fraction, and is more accurate than number and volume distributions; however it is usually influenced by large particles (impurities). Through number distribution and intensity distribution, the average sizes of QACLE micelles were determined to be  $4.81 \pm 0.21$  nm for 5 mM, and  $1.86 \pm 0.07$  nm for 50 mM.

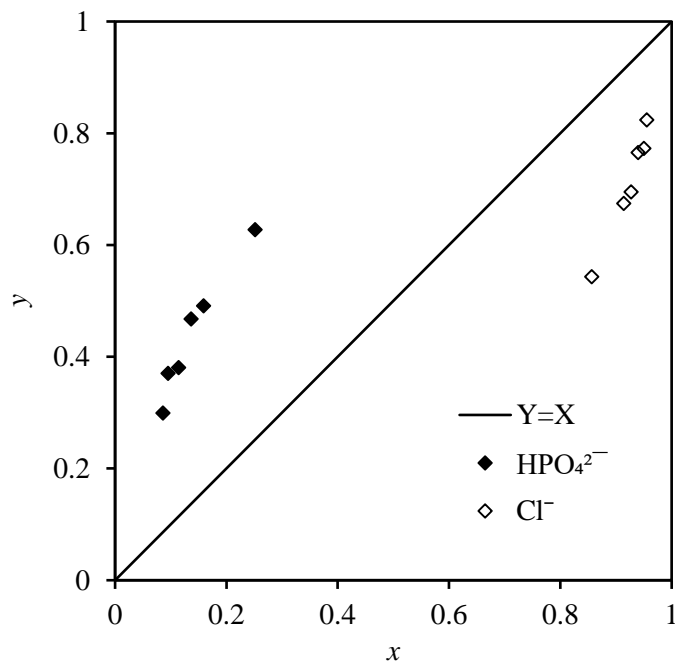

**Figure S3.** Distribution of HPO<sub>4</sub><sup>2-</sup> and Cl<sup>-</sup> in different phases in binary systems

x: normality fraction of anions in the aqueous phase,  $x = \frac{\alpha[A^{\alpha-}]_{aq}}{\alpha[A^{\alpha-}]_{aq} + \beta[B^{\beta-}]_{aq}}$

y: normality fraction of anions in the micellar phase,  $y = \frac{\alpha[A^{\alpha-}]_{mic}}{\alpha[A^{\alpha-}]_{mic} + \beta[B^{\beta-}]_{mic}}$

The experimental conditions of the distribution test were the same as in the experiments to measure selectivity coefficients. It can be seen from the figure, HPO<sub>4</sub><sup>2-</sup> has a much greater affinity for the micellar phase than Cl<sup>-</sup>. For example, when the normality fraction of HPO<sub>4</sub><sup>2-</sup> in the aqueous phase is 0.2 ( $x = 0.2$ ), its normality fraction in the micellar phase is about 0.5 ( $y = 0.5 > x$ ). However, the distribution of Cl<sup>-</sup> is below the line of  $y = x$ , indicating a lower affinity than HPO<sub>4</sub><sup>2-</sup>.

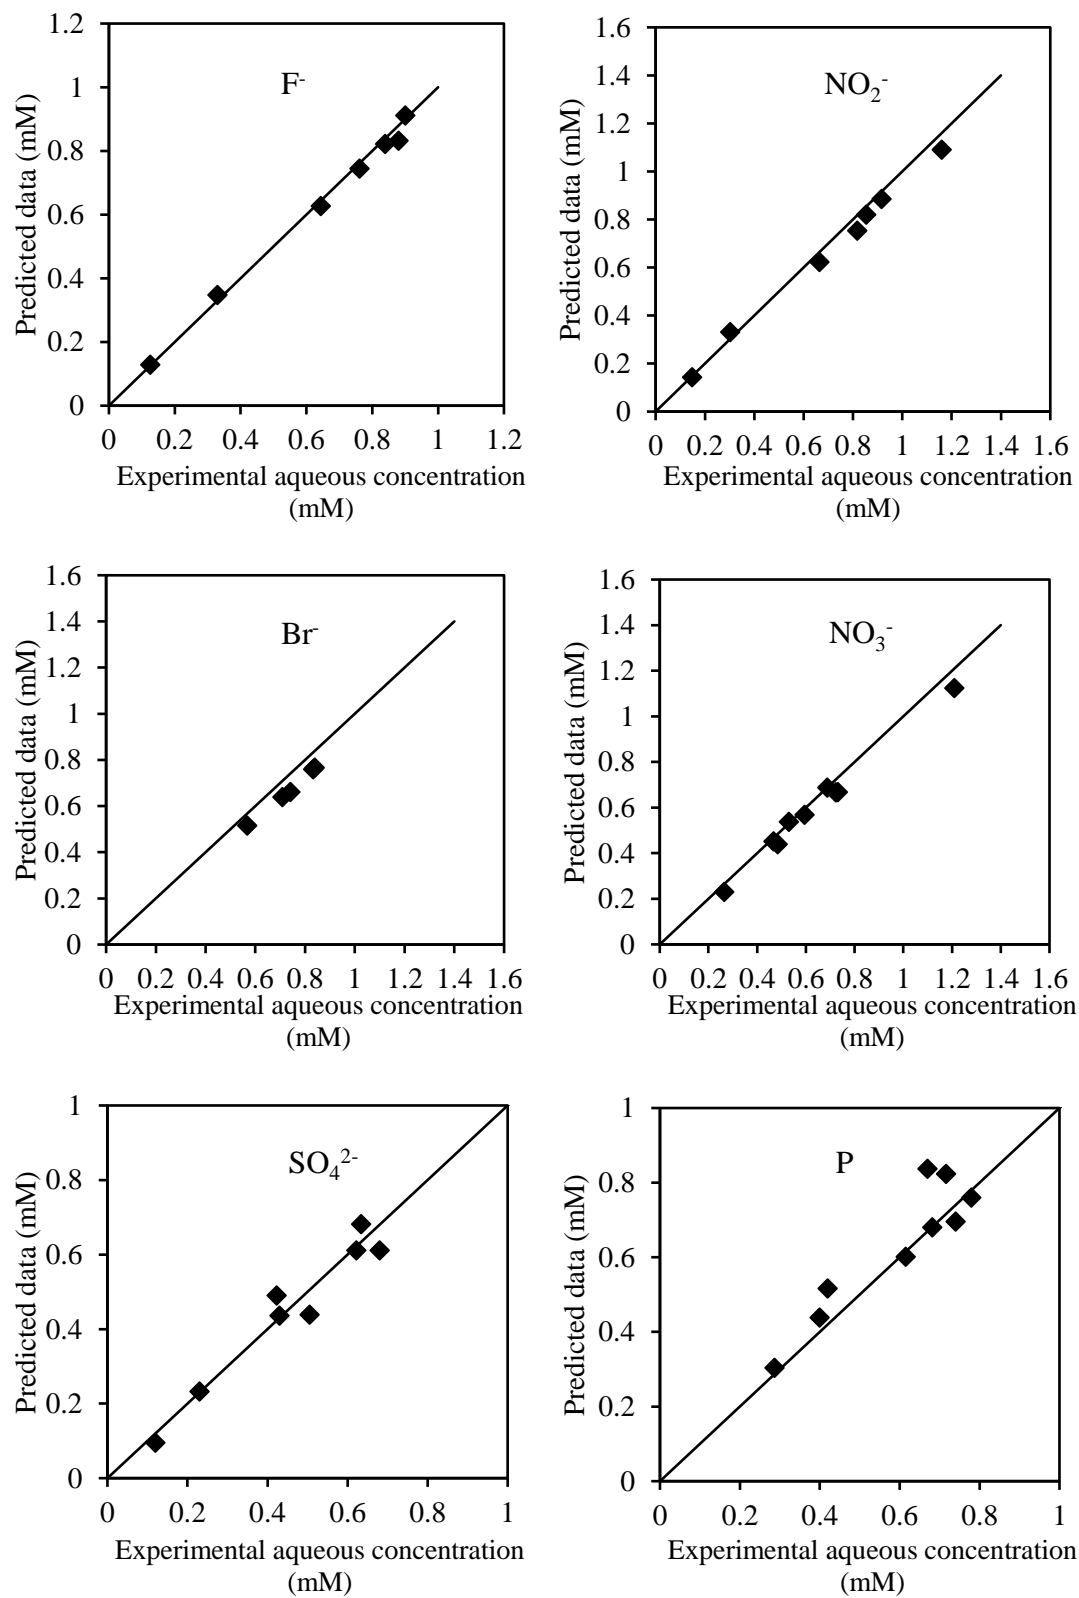

**Figure S4.** Relationship between measured aqueous concentrations and model predicted values for each anion

Reference:

1. M. Chen and C. T. Jafvert, Anion exchange on cationic surfactant micelles, and a speciation model for estimating anion removal on micelles during ultrafiltration of water, *Langmuir*, 2017, **33**, 6540-6549.
